# Supplementary material for: Evidence That Putrescine Modulates the Higher Plant Photosynthetic Proton Circuit
Source: PLoS One. 2012 Jan 12;7(1):e29864. doi: 10.1371/journal.pone.0029864 (PMC3257247; doi:10.1371/journal.pone.0029864)
Supplement: Figure S5 — Energy-dependent antenna down-regulation (qE) as a function of total light-induced pmf . (DOC) [file pone.0029864.s005.doc]

| A | 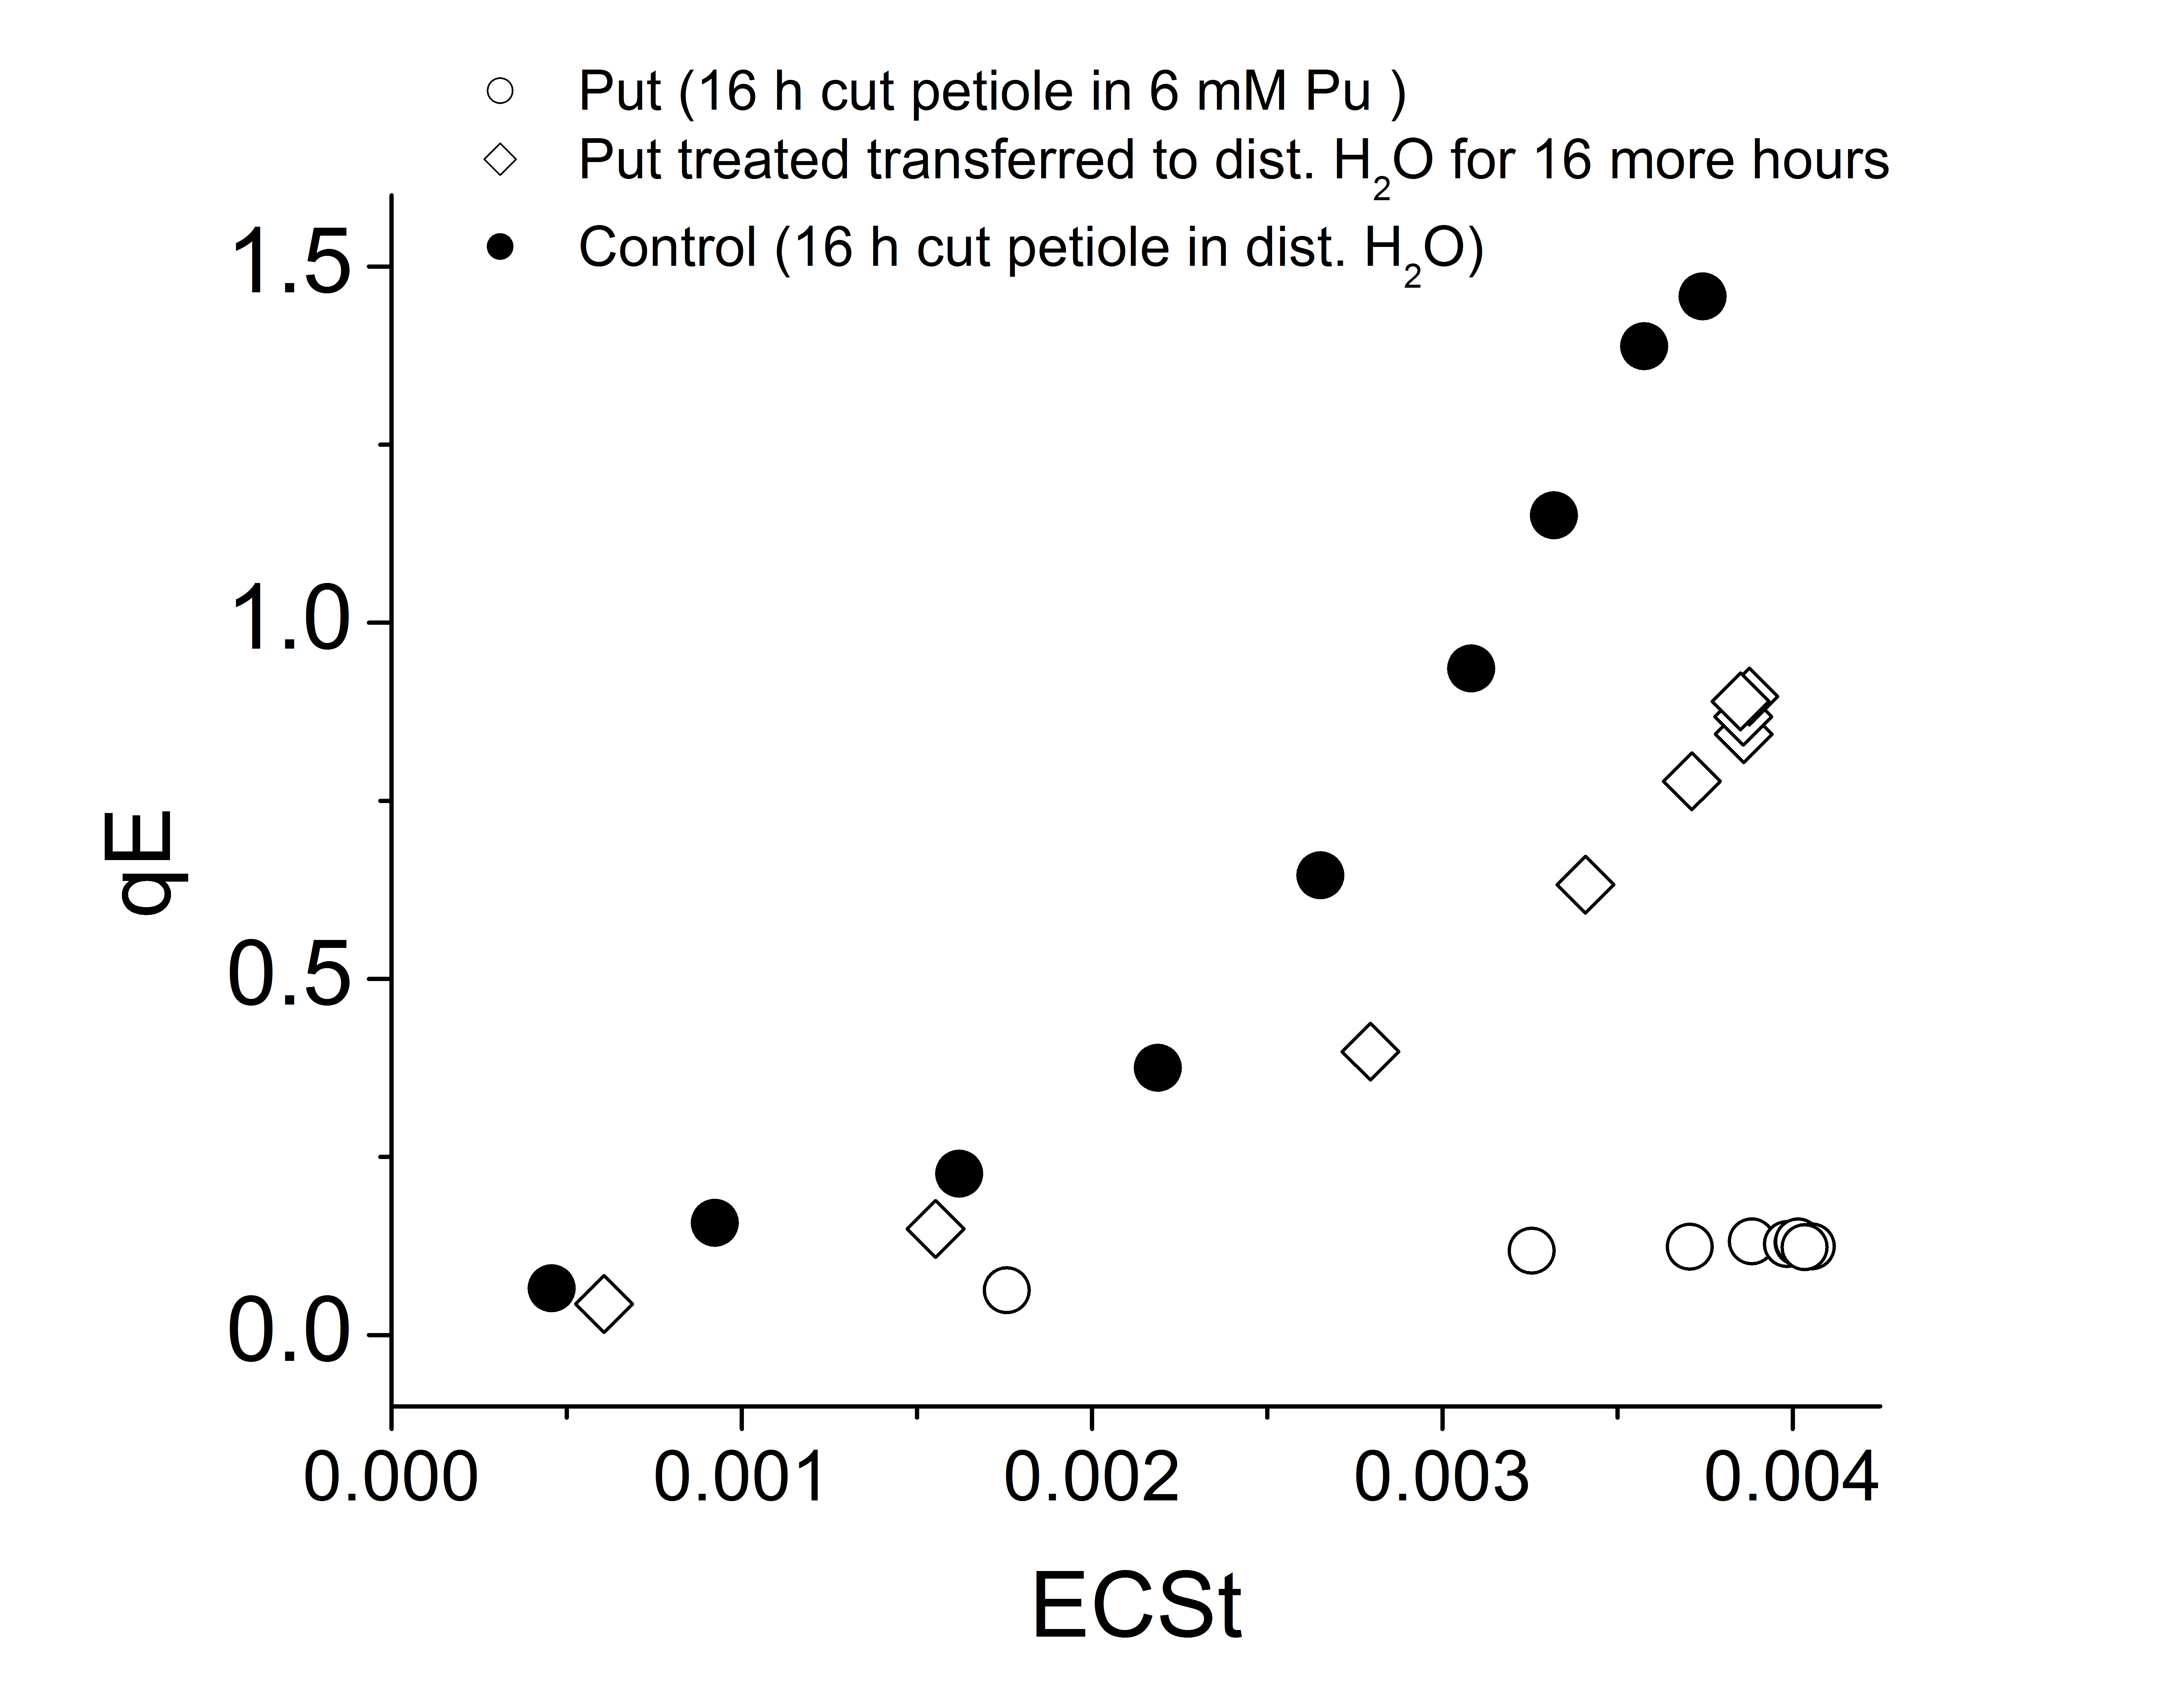 |
| --- | --- |
| B | 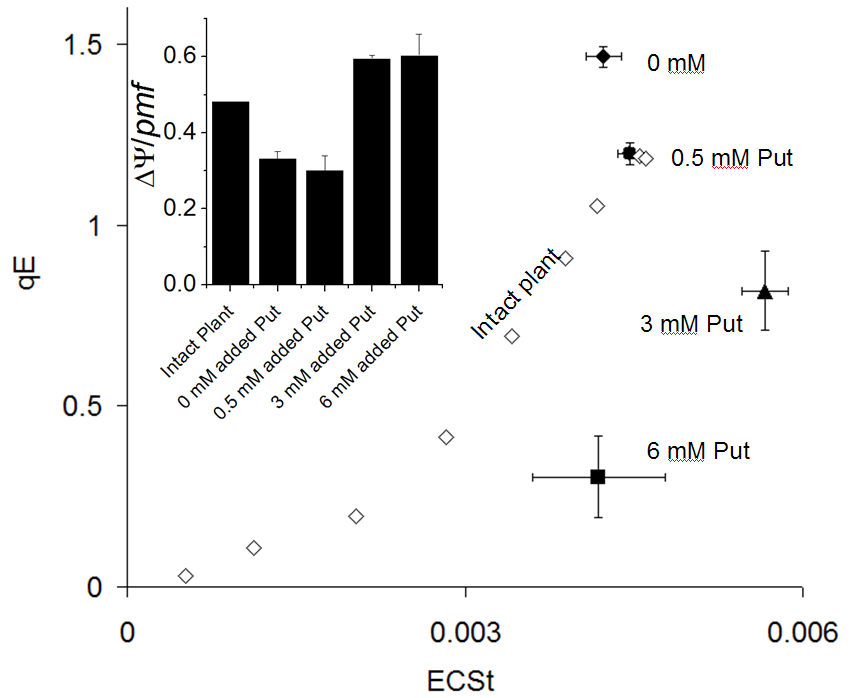 |

**Figure S5**. **Energy-dependent antenna down-regulation (qE) as a function of total light-induced *pmf.*** Tobacco leaves infiltrated through petiole with Put for 16 h (open circles) were measured under steady state photosynthetic conditions with light intensities from 64 to 678 μmol of photons m-2s-1 and show an almost complete inhibition of qE activation at any light induced *pmf* tested (indications of a strongly buffered lumen pH). Untreated controls (detached leaf with petiole in distilled water) show normal activation of qE (closed symbols). This striking effect is reversible to significant extent upon simple transfer of the leaf petiole in distilled water and further incubation for 16 h (open diamonds). The data in the panel A are from a single experiments illustrating the flexibility of the system. Similar dramatic effects were recorded with 3 independent experiments at a single light intensity and different doses of Put (0.5 mM, 3 mM and 6 mM Put) (panel B). This lower sensitivity was consistent with an increased Δψ/*pmf* (inset panel B). Bars denote standard error from 3 independent measurements while open diamonds correspond to the initial conditions (tobacco plant before leaf detachment).
